# Supplementary material for: Diquafosol tetrasodium elicits total cholesterol release from rabbit meibomian gland cells via P2Y2 purinergic receptor signalling
Source: PubMed Central journal article supplement (PMC7997929; doi:10.1038/s41598-021-86433-6), 2021-03-26
Supplement: 41598_2021_86433_MOESM1_ESM.pdf [file 41598_2021_86433_MOESM1_ESM.pdf]

**Diquafosol sodium elicits total cholesterol release from rabbit meibomian gland cells via P2Y<sub>2</sub> purinergic receptor signalling**

Ken-ichi Endo<sup>1,\*</sup>, Asuka Sakamoto<sup>1</sup>, Koushi Fujisawa<sup>1</sup>

<sup>1</sup>Pharmaceutics & Pharmacology, Research and Development Division, Santen Pharmaceutical Co., Ltd., Nara, Japan.

\*Corresponding author

Pharmaceutics & Pharmacology, R&D Division, Santen Pharmaceutical Co., Ltd.,  
8916-16 Takayama-cho, Ikoma-shi, Nara 630-0101, Japan

E-mail: kenichi.endo@santen.com

Tel: +81-743-79-4525, Fax: +81-743-79-4591

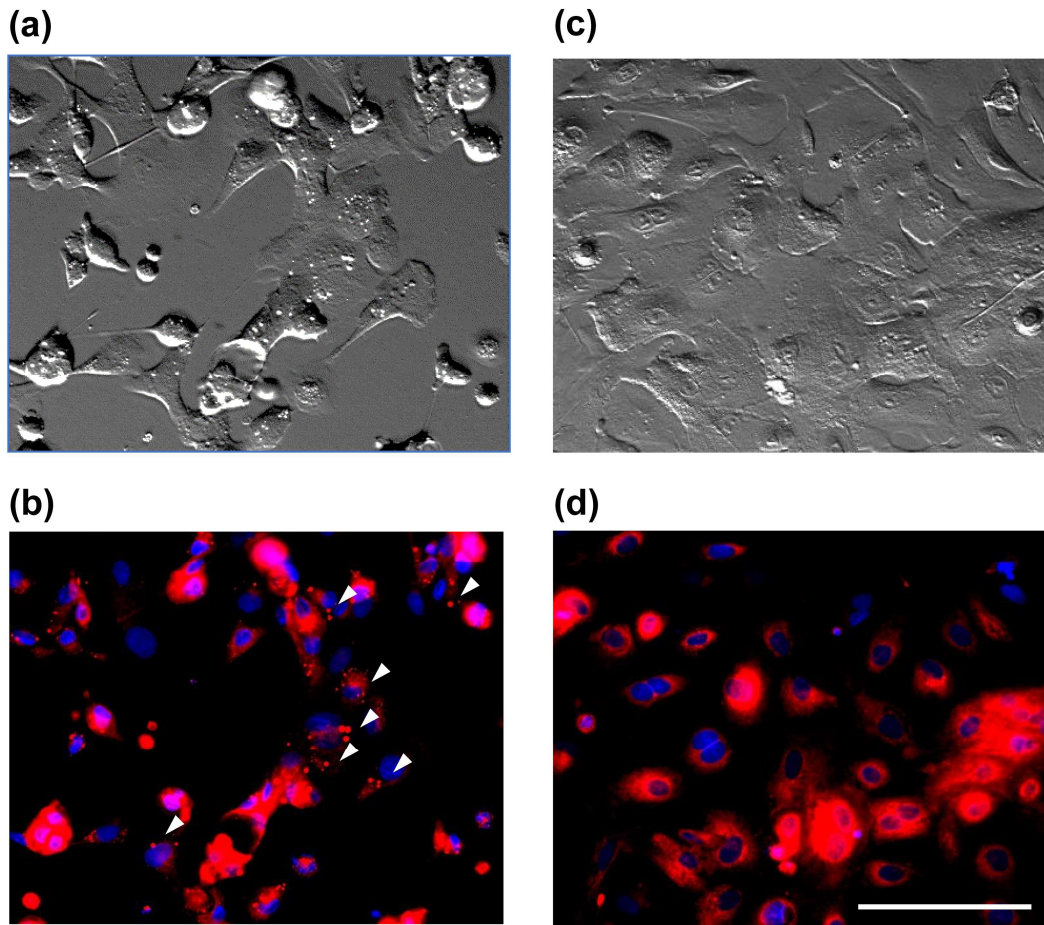

**Supplementary Figure S1.** Microscopic images of rabbit meibocyte culture after induction of differentiation

Cells were cultured in serum-free culture medium following treatment with (a, b) and without (c, d) 10  $\mu$ M pioglitazone. (a, c) The bright fields with Hoffman's modulation contrast system. (b, d) The fluorescent images stained with Nile red (red) and Hoechst 33342 (blue). Arrowheads indicate droplet-like Nile red staining in the cells, bar = 150  $\mu$ m.

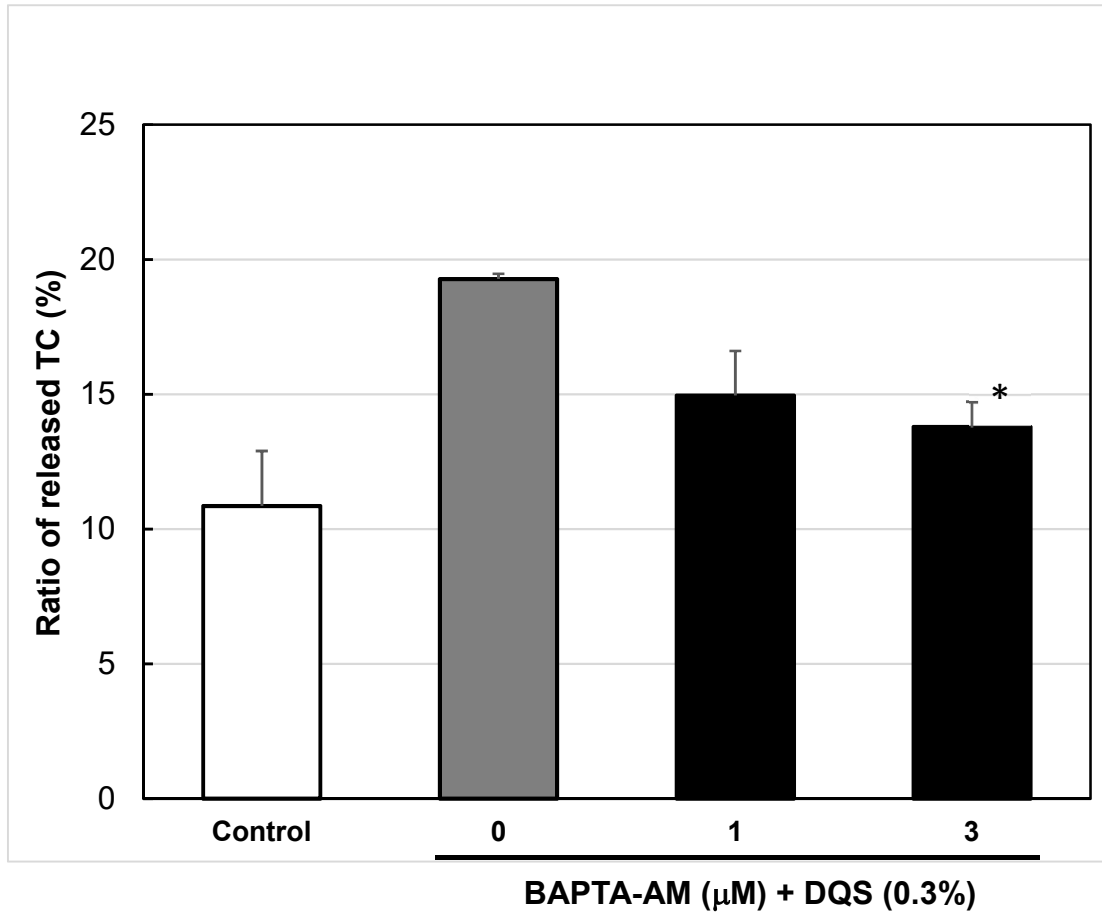

**Supplementary Figure S2.** Effect of BAPTA-AM on increase of TC release from the meibocytes caused by DQS

Each value represents mean  $\pm$  S.E.M. obtained from 3 culture replicates. \* $p < 0.05$ , compared with DQS only.

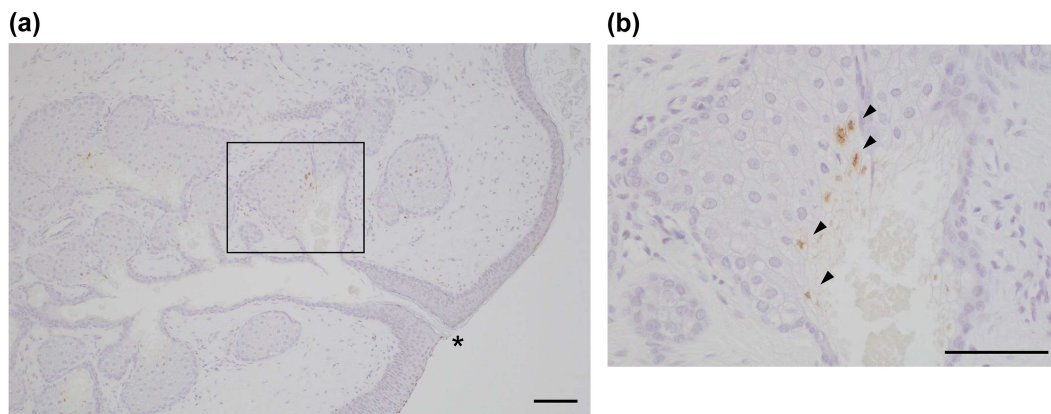

**Supplementary Figure S3.** TUNEL staining on histological section of rabbit eyelid

(a) Longitudinal section along a unit of meibomian gland. (b) The boxed area in right image under high magnification. Asterisk (\*) indicates the orifice of meibomian gland unit. Cells having brownish nucleic residues (arrowheads) indicate TUNEL-positive cells, bar = 100  $\mu\text{m}$ .

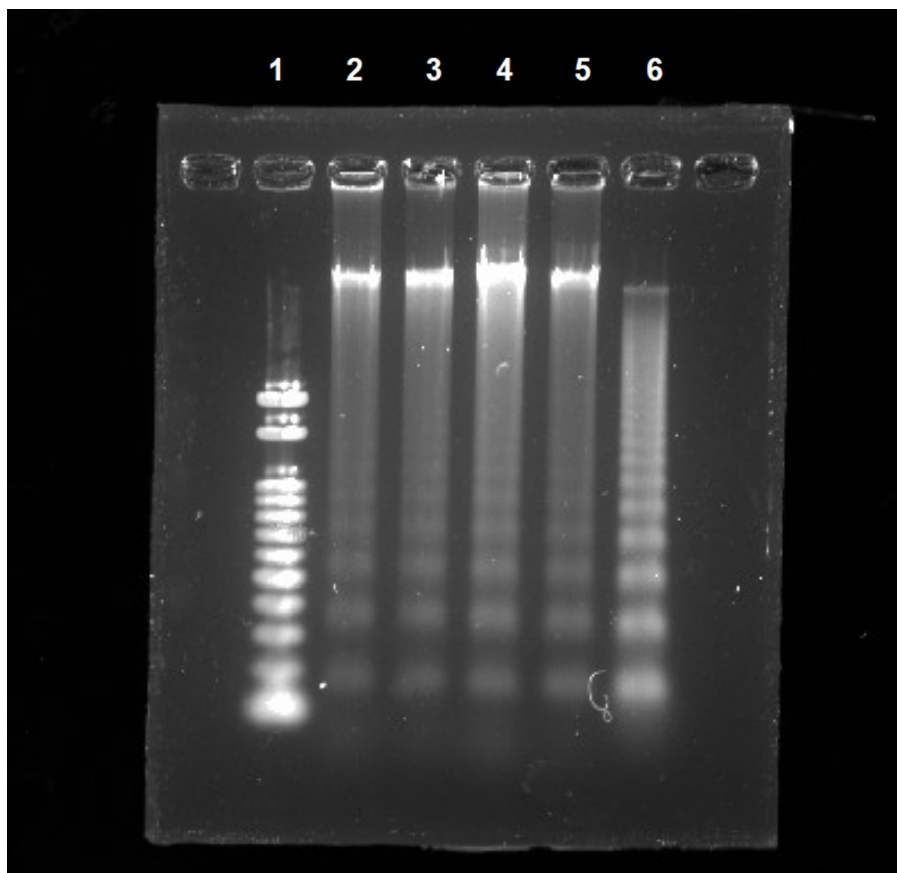

**Supplementary Figure S4.** Full-length image of the agarose gel electrophoresis displayed in Fig. 3a

See Figure 3 for the correspondence between lane numbers and samples.
